# Supplementary material for: Template-assisted synthesis of uniform nanosheet-assembled silver hollow microcubes
Source: Royal Society of Chemistry journal article supplement (doi:10.1039/c2nr32054a), 2012-01-01
Supplement: c2nr32054a.pdf [file c2nr32054a.pdf]

Supporting information:

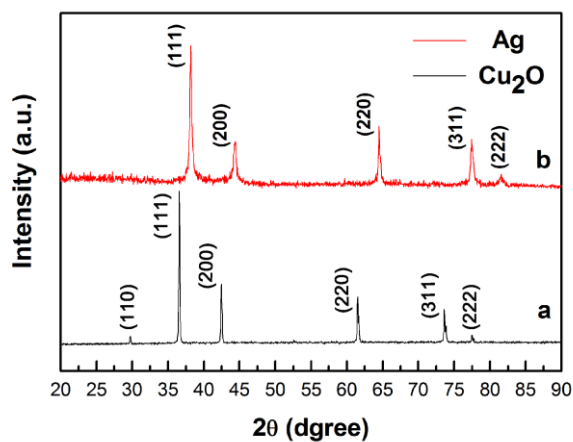

Fig. S1 XRD patterns of (a) the  $\text{Cu}_2\text{O}$  microcubes and (b) the nanosheet-assembled Ag hollow microcubes.

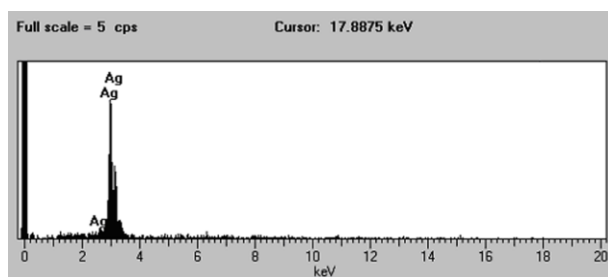

Fig. S2 EDX spectrum of the nanosheet-assembled Ag hollow microcubes.

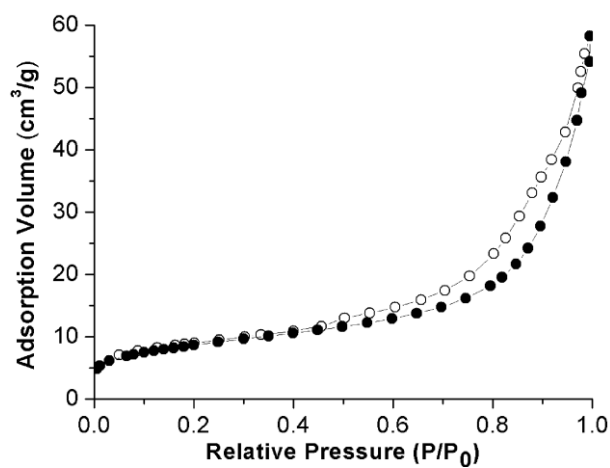

Fig. S3 Nitrogen adsorption-desorption isotherm of the nanosheet-assembled Ag hollow microcubes.

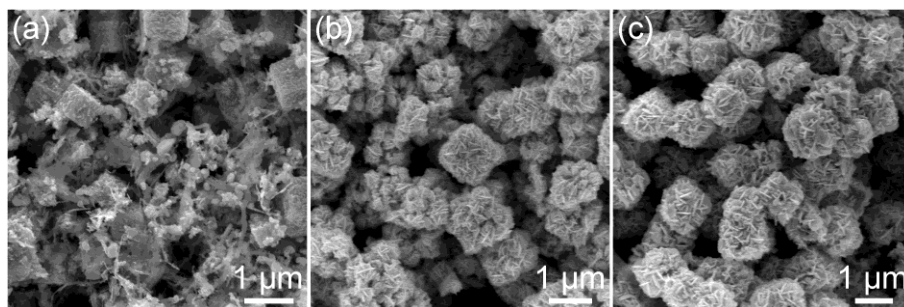

**Fig. S4** SEM images of product synthesized with different amount of trisodium citrate: (a) 0 mmol, (b) 0.3 mmol, and (c) 1.2 mmol.

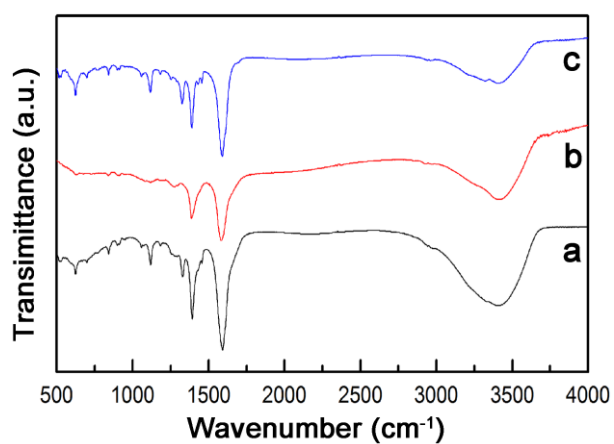

**Fig. S5** FTIR spectra of (a) the TSC-Ag power, (b) the product synthesized with the molar ratio of Ag and Cu 3: 1, (c) the product synthesized with the amount of sodium citrate 1.2 mmol.
